# Supplementary material for: A deep-learning-technique-based data-driven model for accurate and rapid flood predictions in temporal and spatial dimensions
Source: Copernicus journal article supplement (doi:10.5194/hess-27-1791-2023), 2023-05-05
Supplement: Supplementary file 1 [file hess-27-1791-2023-supplement.pdf]

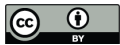

*Supplement of*

## **A deep-learning-technique-based data-driven model for accurate and rapid flood predictions in temporal and spatial dimensions**

**Qianqian Zhou et al.**

*Correspondence to:* Qianqian Zhou (qiaz@foxmail.com) and Gongfa Chen (gongfa.chen@gdut.edu.cn)

The copyright of individual parts of the supplement might differ from the article licence.

## Supplementary material

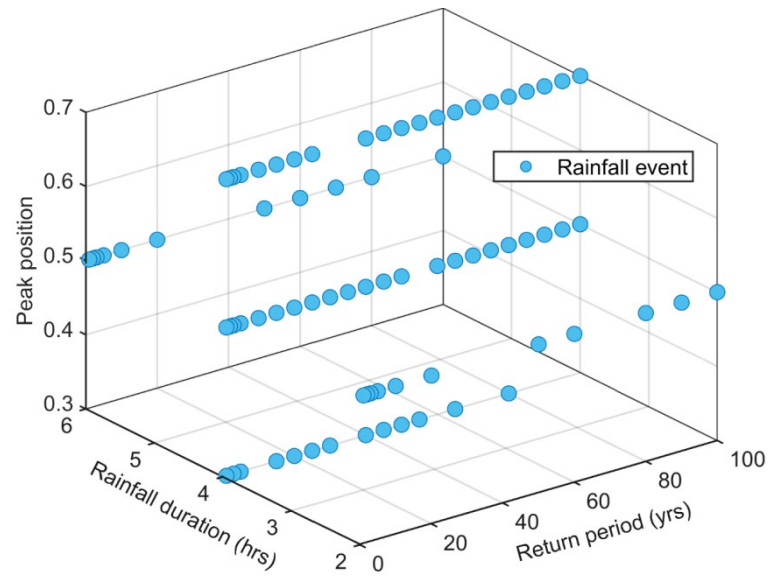

**Figure S1.** Details on the return period, rainfall duration and peak position of the input rainfall events.
